# Supplementary figures and images for: An experimental study on the influence of trace impurities on ionization of atmospheric noble gas dielectric barrier discharges
Source: Royal Society of Chemistry journal article supplement (doi:10.1039/c6an01352j), 2016-01-01

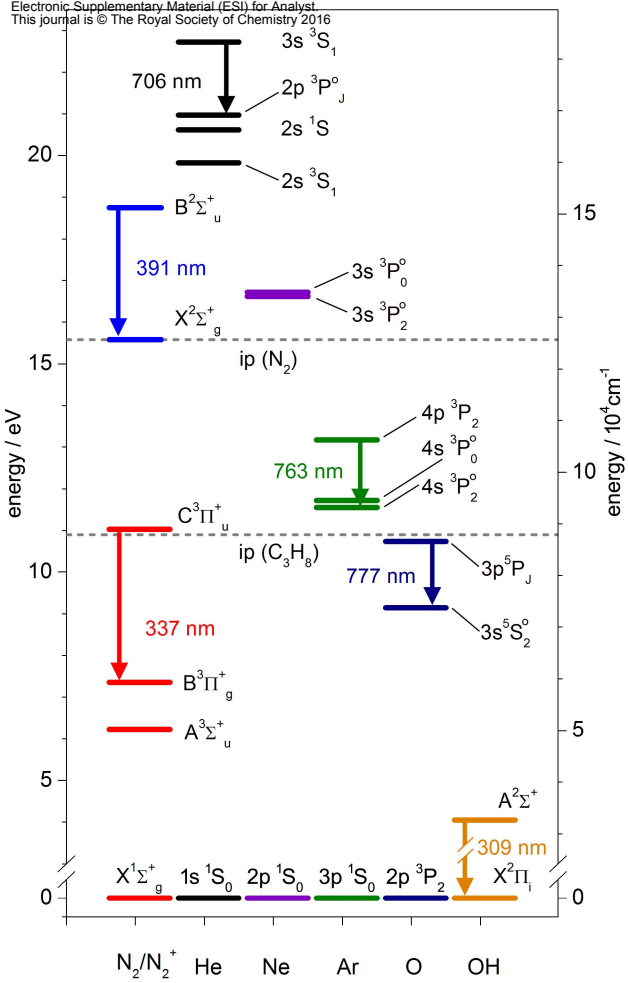

Supplement: c6an01352j1.pdf [file c6an01352j1.pdf]
